# Supplementary material for: A study on the knowledge, attitude, and practice regarding home-based Tele-rehabilitation among stroke patients and its influencing factors
Source: Research Square preprint supplement (doi:10.21203/rs.3.rs-7961845/v1), 2025-12-17
Supplement: Supplementary file 1 [file 2607dc4cd28f6a74e9dd538f.docx]

**Attitude dimension**

| **Attitude Items** | **Strongly Disagree** | **Disagree** | **Neutral** | **Agree** | **Strongly Agree** |
| --- | --- | --- | --- | --- | --- |
| 1.I believe HB-TR is very important for functional recovery. | 56  (14.5%) | 25  (6.5%) | 94  (24.4%) | 45  (11.7%) | 165  (42.9%) |
| 2.I am willing to try the new model of HB-TR. | 70  (18.2%) | 38  (9.9%) | 69  (17.9%) | 56  (14.5%) | 152  (39.5%) |
| 3.I believe HB-TR can save the time and cost of going to the hospital. | 58  (15.1%) | 30  (7.8%) | 63  (16.4%) | 51  (13.2%) | 183  (47.5%) |
| 4.I believe that actively cooperating with the doctor's treatment plan and communicating with them in a timely manner is very important for rehabilitation. | 20  (5.2%) | 18  (4.7%) | 37  (9.6%) | 42  (10.9%) | 268  (69.6%) |
| 5.Family members' participation in supervision can improve my enthusiasm for training. | 40  (10.4%) | 26  (6.8%) | 42  (10.9%) | 52  (13.5%) | 225  (58.4%) |
| 6.I am willing to pay part of the cost for HB-TR services. | 82  (21.3%) | 37  (9.6%) | 66  (17.1%) | 41  (10.6%) | 159  (41.3%) |
| 7.I believe HB-TR should be included in medical insurance reimbursement. | 21  (5.5%) | 14  (3.6%) | 32  (8.3%) | 25  (6.5%) | 293  (76.1%) |
| 8.If the operation of the HB-TR platform is technically complex, I am willing to learn it. | 107  (27.8%) | 35  (9.1%) | 70  (18.2%) | 40  (10.4%) | 133  (34.5%) |
| 9.I am willing to bear the potential safety risks during HB-TR training. | 97  (25.2%) | 50  (13.0%) | 75  (19.5%) | 41  (10.6%) | 122  (31.7%) |
| 10.I prefer passive training (referring to physical activities conducted by patients with the help of therapists, family members, or equipment, without active effort from the patients themselves) over active participation in HB-TR training. | 164  (42.6%) | 35  (9.1%) | 78  (20.3%) | 28  (7.3%) | 80  (20.8%) |
| 11.I prefer simple training methods over challenging ones. | 152  (39.5%) | 46  (11.9%) | 83  (21.6%) | 33  (8.6%) | 71  (18.4%) |
| 12.If I do not conduct home-based rehabilitation, my functional impairments may worsen. | 57  (14.8%) | 30  (7.8%) | 57  (14.8%) | 55  (14.3%) | 186  (48.3%) |
| 13.Faced with the disease, I can maintain a good mindset and actively cooperate with treatment and rehabilitation. | 22  (5.7%) | 28  (7.3%) | 46  (11.9%) | 58  (15.1%) | 231  (60.0%) |
