# Supplementary material for: A study on the knowledge, attitude, and practice regarding home-based Tele-rehabilitation among stroke patients and its influencing factors
Source: Research Square preprint supplement (doi:10.21203/rs.3.rs-7961845/v1), 2025-12-17
Supplement: Supplementary file 2 [file 633c775ab87e055d760a9a3e.docx]

**Knowledge dimension**

| **Knowledge Items** | **Accuracy** |
| --- | --- |
| 1. Home-based Tele-rehabilitation (HB-TR) refers to a new type of rehabilitation model that uses modern information technologies, such as the Internet, mobile communication devices (smartphones/tablets), and remote monitoring technologies, allowing patients to receive professional rehabilitation guidance and treatment in their own homes? | 216  (56.1%) |
| 2.Does the professional team for HB-TR include rehabilitation doctors, therapists, nurses, and dietitians? | 212  (55.1%) |
| 3.Does HB-TR training include the following contents: bed activity training, balance training, walking training, speech pronunciation practice, hand fine motor skill practice, etc.? | 234  (60.8%) |
| 4. Does HB-TR management include weight management, sleep management, diet management, medication management, and other contents? | 250  (64.9%) |
| 5.Can rehabilitation doctors or therapists conduct assessments on patients through HB-TR (via video calls, online platforms, etc.) to understand the patients' physical conditions and the degree of functional impairments? | 237  (61.6%) |
| 6.Can rehabilitation doctors or therapists formulate personalized rehabilitation plans for patients based on assessment results, including rehabilitation training plans, dietary recommendations, psychological support, etc., send the plans to patients via the Internet, and monitor patients' progress in real time to adjust the rehabilitation plans promptly? | 224  (58.2%) |
| 7.Can HB-TR be started when the patient's condition is stable after a stroke? | 212  (55.1%) |
| 8.Is HB-TR a process that requires active participation of patients? | 264  (68.6%) |
| 9.When patients conduct home-based rehabilitation training according to the plan formulated by doctors, can they communicate with rehabilitation doctors or therapists at any time through video calls, online platforms, etc., to obtain guidance and help? | 249  (64.7%) |
| 10.Does HB-TR bring convenience to patients by eliminating the need for frequent hospital visits, thus saving time and energy? | 259  (67.3%) |
| 11.Can HB-TR reduce medical costs, decrease the length of hospital stay and the number of hospitalizations for patients, and at the same time improve the efficiency of medical resource utilization? | 259  (67.3%) |
| 12.Can HB-TR provide long-term and continuous rehabilitation services, which is conducive to the consolidation and improvement of patients' rehabilitation effects and plays a positive role in functional recovery? | 261  (67.8%) |
| 13.May patients face risks such as irregular movements, training injuries, and excessive fatigue when conducting HB-TR ? | 268  (69.6%) |
| 14.Should patients follow the following principles when conducting HB-TR : proceeding in a gradual and orderly manner, persisting consistently, avoiding excessive fatigue, etc.? | 311  (80.8%) |
| 15.Should patients seek medical attention immediately when the following conditions occur during rehabilitation: worsening headache, sudden limb weakness or numbness, deviated mouth, slurred speech, confusion, etc.? | 312  (81.0%) |
| 16.Are the high-risk factors for stroke including hypertension, hyperglycemia, hyperlipidemia, smoking and alcohol abuse, staying up late, etc.? | 297  (77.1%) |
| 17.Is the rehabilitation effect of patients related to the degree of disease-related damage and their own initiative? | 292  (75.8%) |
| 18.Is family care and support more conducive to the implementation of HB-TR ? | 281  (73.0%) |
