# Supplementary material for: A study on the knowledge, attitude, and practice regarding home-based Tele-rehabilitation among stroke patients and its influencing factors
Source: Research Square preprint supplement (doi:10.21203/rs.3.rs-7961845/v1), 2025-12-17
Supplement: Supplementary file 3 [file 7238ba2bd4cdf1d3a471eb0d.docx]

**Univariate and multivariate analysis cutoff values**

| **Cutoff values: knowledge, attitude, practice as the median** | **N (%)** |
| --- | --- |
| Total score of knowledge dimension |  |
| **Ksum>=13** | 224 (58.2%) |
| **Ksum<=12** | 161 (41.8%) |
| Attitude dimension total score |  |
| **Asum>=46** | 218 (56.6%) |
| **Asum<=45** | 167 (43.4%) |
| Total score of practice dimension |  |
| **Psum>=23** | 144 (37.4%) |
| **Psum<=22** | 241 (62.6%) |
