# Supplementary material for: A study on the knowledge, attitude, and practice regarding home-based Tele-rehabilitation among stroke patients and its influencing factors
Source: Research Square preprint supplement (doi:10.21203/rs.3.rs-7961845/v1), 2025-12-17
Supplement: Supplementary file 4 [file a002a7aa70ce85fccd54ded1.docx]

**Questionnaire**

**Basic Information**

**Name:** **________**

**1.Gender:** ○ Male ○ Female

**2.Age:** ○＜45 years old ○ 45-60 years old ○＞60 years old

**3.Type of Stroke:** ○ Ischemic stroke ○ Hemorrhagic stroke

**4.Duration of stroke:** ○＜6 months ○ 6 months-1year ○＞1year Specific

**5.Educational level:** ○ Middle school or below ○ High school/ technical school

○ Associate degree and above

**6.Marital status:** ○ Married ○ Others (divorced, widowed, unmarried)

**7. Work status:** ○ Employed ○ Retired ○ Other（Unemployed/Self-employed）

**8.Type of medical insurance:** ○ Urban medical insurance ○ Rural medical insurance ○ Commercial insurance ○ Others

**9.Personal monthly income:** ○＜6000RMB ○ 6000-10000RMB ○＞10000RMB

**10.Pre-morbid living situation:** ○ Lived alone ○ Lived with family

**12.Primary caregiver:** ○ No ○ Nanny/caregiver, etc. ○Parents/spouse/children and other relatives

**13.Hobbies:** ○ No ○Yes（Board games、Ball games、Gardening、Dancing、Singing、________）

**14.Do you have any of the following** **underlying** **medical condition：**

○ Hypertension ○ Diabetes ○ Heart Disease ○ No

**15. Exercise habits before the onset of the disease:** ○ No ○ Yes

**16.Current frequency of rehabilitation exercise per week:**

○ Never exercise ○ 1-3 times per week ○ 4-6 times per week ○Every day

**17.Current functional impairments:** ○ Limb motor dysfunction ○ Sensory impairment ○ Balance disorder ○ Dysphagia ○ Speech disorder ○ Others

**18. Level of independence (eating, bathing, dressing, using the toilet, etc.):**

○ Completely independent ○ Partially independent ○ Fully dependent
