# Supplementary material for: A study on the knowledge, attitude, and practice regarding home-based Tele-rehabilitation among stroke patients and its influencing factors
Source: Research Square preprint supplement (doi:10.21203/rs.3.rs-7961845/v1), 2025-12-17
Supplement: Supplementary file 5 [file cd29423246a5307ada8dadaa.docx]

**Practice dimension**

| **Practice Items** | **Never** | **Occasionally (1~2 per week** | **Sometimes (3~4 per week** | **Often** |
| --- | --- | --- | --- | --- |
| 1.If a HB-TR platform is available, will you conduct rehabilitation training according to the plan guided by it? | 14  (3.6%) | 77  (20.0%) | 163  (42.3%) | 131  (34.0%) |
| 2.What is the frequency of your HB-TR training per week? | 18  (4.7%) | 72  (18.7%) | 151  (37.4%) | 144  (37.4%) |
| 3.Do you spend more than 30 minutes on HB-TR training each time? | 31  (8.1%) | 90  (23.4%) | 135  (35.1%) | 129  (33.5%) |
| 4.Will you consult the HB-TR platform team in a timely manner when encountering problems during telehome rehabilitation? | 28  (7.3%) | 83  (21.6%) | 130  (33.8%) | 144  (37.4%) |
| 5.Can you listen to and follow the healthy living habits advocated by the HB-TR platform team (quitting smoking and drinking, having a light diet, maintaining a regular schedule, controlling weight, etc.)? | 13  (3.4%) | 72  (18.7%) | 130  (33.8%) | 170  (44.2%) |
| 6.Since suffering from stroke, have you taken the initiative to learn knowledge related to stroke rehabilitation? | 98  (25.5%) | 134  (34.8%) | 76  (19.7%) | 77  (20.0%) |
| 7.Since suffering from stroke, have you persisted in regular reexaminations (once every 3-6 months)? | 18  (4.7%) | 87  (22.6%) | 108  (28.1%) | 172  (44.7%) |
| 8.Will you actively participate in community and other types of social activities? | 101  (26.2%) | 124  (32.2%) | 88  (22.9%) | 72  (18.7%) |
